# Supplementary material
Source: MDPI journal article supplement (https://www.mdpi.com/2073-4441/15/12/2151)
Supplement: s1 [file water-2366854-supplementary.pdf › water-2366854-supplementary.pdf]

## **Supplementary Materials**

# **Numerical Evaluation of Large-Scale Groundwater Extraction in Groundwater System at Wellfields in the Namwon Area of Jeju Island, South Korea**

**Hyun Jung Kim, Eun-Hee Koh \*, Chang-Seong Koh, Won-Bae Park and Min-Cheol Kim**

**Page 1: Supplemental Figure S1. A relation between elevation of the weather station and average annual precipitation rate in the study area.**

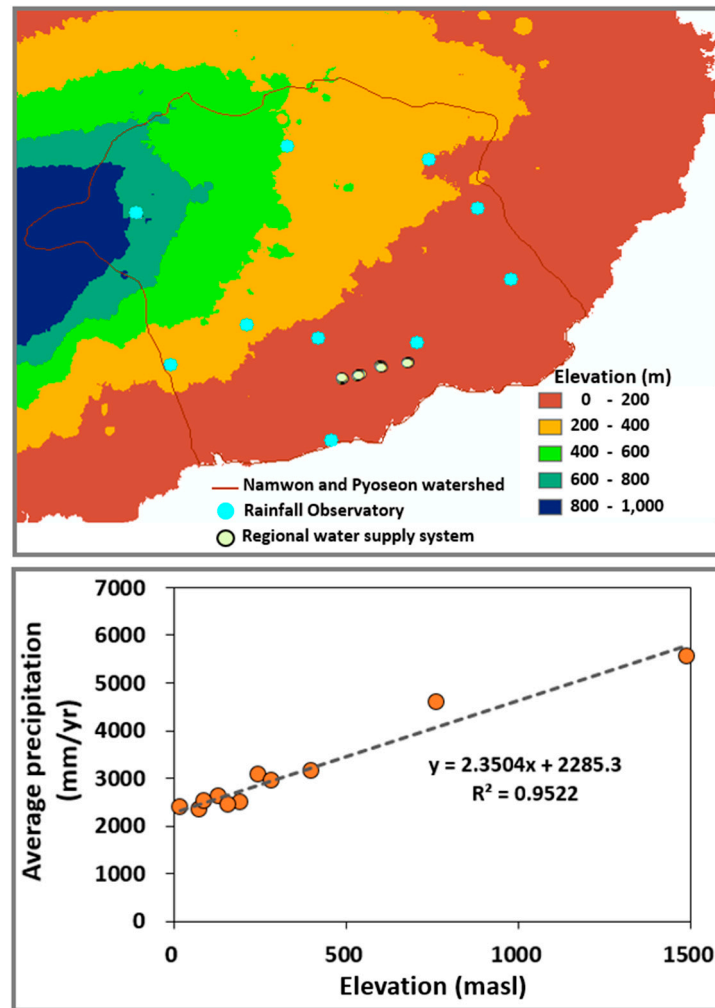

**Figure S1. A relation between elevation of the weather station and average annual precipitation rate in the study area.**
